# Supplementary material for: Human blood vessel organoids reveal a critical role for CTGF in maintaining microvascular integrity
Source: PubMed Central journal article supplement (PMC10492781; doi:10.1038/s41467-023-41326-2), 2023-09-09
Supplement: 41467_2023_41326_MOESM9_ESM.pdf [file 41467_2023_41326_MOESM9_ESM.pdf]

## Reporting Summary

Nature Portfolio wishes to improve the reproducibility of the work that we publish. This form provides structure for consistency and transparency in reporting. For further information on Nature Portfolio policies, see our [Editorial Policies](#) and the [Editorial Policy Checklist](#).

### Statistics

For all statistical analyses, confirm that the following items are present in the figure legend, table legend, main text, or Methods section.

n/a Confirmed

- The exact sample size ( $n$ ) for each experimental group/condition, given as a discrete number and unit of measurement
- A statement on whether measurements were taken from distinct samples or whether the same sample was measured repeatedly
- The statistical test(s) used AND whether they are one- or two-sided  
*Only common tests should be described solely by name; describe more complex techniques in the Methods section.*
- A description of all covariates tested
- A description of any assumptions or corrections, such as tests of normality and adjustment for multiple comparisons
- A full description of the statistical parameters including central tendency (e.g. means) or other basic estimates (e.g. regression coefficient) AND variation (e.g. standard deviation) or associated estimates of uncertainty (e.g. confidence intervals)
- For null hypothesis testing, the test statistic (e.g.  $F$ ,  $t$ ,  $r$ ) with confidence intervals, effect sizes, degrees of freedom and  $P$  value noted  
*Give  $P$  values as exact values whenever suitable.*
- For Bayesian analysis, information on the choice of priors and Markov chain Monte Carlo settings
- For hierarchical and complex designs, identification of the appropriate level for tests and full reporting of outcomes
- Estimates of effect sizes (e.g. Cohen's  $d$ , Pearson's  $r$ ), indicating how they were calculated

*Our web collection on [statistics for biologists](#) contains articles on many of the points above.*

### Software and code

Policy information about [availability of computer code](#)

#### Data collection

Immunostained samples were viewed and imaged using the Spinning Disk Confocal System (Nikon) and the Operetta CLS High-Content Analysis System (PerkinElmer). qPCR was performed using a ViiA 7 real-time PCR system. Flow cytometry data were acquired using a LSRI Fortessa Flow Cytometer analyzer (BD). Extracellular flux analyses studies were performed using a Seahorse XF24 analyzer (Agilent) and Cell nuclei were imaged using Li-cor Odyssey imager. Vascular network images were taken using a Nikon Eclipse TS100 microscope and Nikon DS-Fil camera. Peptide samples were injected and separated by an UltiMate3000 RSLCnano system (EASY-Spray C18 reversed-phase column, 75 $\mu$ m x 50cm, 2  $\mu$ m, Thermo Fisher Scientific). The separated peptides were directly injected into an Orbitrap Q Exactive HF Mass Spectrometer (Thermo Fisher Scientific). For metabolomic analysis, a 1290 Infinity II ultrahigh performance liquid chromatography (UHPLC) system coupled to a 6546-quadrupole time-of-flight (Q-TOF) mass spectrometer (Agilent Technologies) were used. Luciferase activity was measured on an Infinite M200Pro (TECAN) plate reader.

#### Data analysis

ImageJ software (Fiji, version 1.53t) was used to quantify pericyte coverage and basement membrane thickness. Vessel Analysis Plugin on ImageJ was used to quantify vessel density and length. ViiA7 software was used to analyse qPCR data. GraphPad Prism 9.0 software was used to prepare charts, t-tests and ANOVA tests. The EBayes method of the limma package (version 3.56.2) was used for differential expression analysis of the proteomics data and corrections for multiple testing were conducted with the Benjamini-Hochberg method using python scripts. Beanplots and Volcano Plots were constructed using the Beanplots, Ggplot2 and Corrplot packages of the R programming environment, using R version 4.2.1. Network visualizations were conducted using Cytoscape tool (version 3.9.0) with protein-protein interaction networks being reconstructed from String web tool (version 11.5). Pathway and functional enrichment analysis were conducted using DAVID tool (version 2021). This analysis included pathway terms from Reactome Pathway Database (version 3.7), KEGG (release 101.0) and functional terms from Gene Ontology (release 2022-03). Transcriptional factor enrichment analysis was performed using the ChEA3 tool (version 3) using the ENCODE ChIP-sequencing data (update June 2017). Metabolite identification and feature annotation and were performed with MassHunter Profinder (version 10.0.2, Agilent Technologies) using our in-house curated metabolite library based on

metabolite standards (Sigma-Aldrich).

FACS data were analyzed using FlowJo software (Becton & Dickinson and Company).

For manuscripts utilizing custom algorithms or software that are central to the research but not yet described in published literature, software must be made available to editors and reviewers. We strongly encourage code deposition in a community repository (e.g. GitHub). See the Nature Portfolio [guidelines for submitting code & software](#) for further information.

## Data

Policy information about [availability of data](#)

All manuscripts must include a [data availability statement](#). This statement should provide the following information, where applicable:

- Accession codes, unique identifiers, or web links for publicly available datasets
- A description of any restrictions on data availability
- For clinical datasets or third party data, please ensure that the statement adheres to our [policy](#)

Source data are provided with this paper.

Proteomic raw data were analysed using Proteome Discoverer (version 2.4, Thermo Fisher Scientific) with MASCOT algorithm (version 2.6.0, Matrix Science) and UniProt/SwissProt human and bovine protein database version 2021\_01, 26410 protein entries, <https://www.uniprot.org/taxonomy/9606>, <https://www.uniprot.org/taxonomy/9913>). Only proteins reported at the MatrisomeDB (<https://matrisomedb.org/>) plus some additional secreted proteins from our in-house generated database were considered. The signalP tool (version 5.0, <https://services.healthtech.dtu.dk/services/SignalP-5.0/>) was used to classify proteins as secreted. The limma package has been used to compare different phenotypes using the EBayes algorithm and correcting for selected covariates. Beanplots and Volcano Plots were constructed using the Beanplots, Ggplot2 and Corplot packages of the R programming environment, using R version 4.2.1. Network visualizations were conducted using Cytoscape tool (<https://cytoscape.org/>) with protein-protein interaction networks being reconstructed from String web tool (<https://string-db.org/>). Pathway and functional enrichment analysis were conducted using David tool (<https://david.ncifcrf.gov/tools.jsp>). This analysis included pathway terms from Reactome data repository (<https://reactome.org/PathwayBrowser/>), KEGG (<https://www.genome.jp/kegg/pathway.html>) and functional terms from Gene Ontology (<http://geneontology.org/docs/go-enrichment-analysis/>). Transcriptional factor enrichment analysis was performed using the ChEA3 tool (<https://maayanlab.cloud/chea3/>) using the ENCODE ChIP-sequencing data ([https://www.encodeproject.org/chip-seq/transcription\\_factor/](https://www.encodeproject.org/chip-seq/transcription_factor/)).

All data generated or analysed during this study are included in the paper and in its supplementary information files. The mass-spectrometry proteomics data generated and analysed during the current study have been deposited to the ProteomeXchange Consortium via the PRIDE partner repository with the dataset identifier PXD041780 and <https://doi.org/10.6019/PXD041780>.

## Research involving human participants, their data, or biological material

Policy information about studies with [human participants or human data](#). See also policy information about [sex, gender \(identity/presentation\), and sexual orientation](#) and [race, ethnicity and racism](#).

Reporting on sex and gender

Reporting on race, ethnicity, or other socially relevant groupings

Population characteristics

Recruitment

Ethics oversight

Note that full information on the approval of the study protocol must also be provided in the manuscript.

## Field-specific reporting

Please select the one below that is the best fit for your research. If you are not sure, read the appropriate sections before making your selection.

Life sciences  Behavioural & social sciences  Ecological, evolutionary & environmental sciences

For a reference copy of the document with all sections, see [nature.com/documents/nr-reporting-summary-flat.pdf](https://nature.com/documents/nr-reporting-summary-flat.pdf)

## Life sciences study design

All studies must disclose on these points even when the disclosure is negative.

Sample size https://pubmed.ncbi.nlm.nih.gov/30651639/, <https://pubmed.ncbi.nlm.nih.gov/32732889/>, <https://pubmed.ncbi.nlm.nih.gov/34923199/>).

|                 |                                                                                                                                  |
|-----------------|----------------------------------------------------------------------------------------------------------------------------------|
| Data exclusions | No data was excluded from this study.                                                                                            |
| Replication     | For all the assays, three independent experiments were performed . All the biological and technical samples were successful.     |
| Randomization   | Organoids from different preparations were randomly allocated into experimental groups.                                          |
| Blinding        | Blinding was not relevant to this study because all parameters applied were objective and no subjective assessment was involved. |

## Reporting for specific materials, systems and methods

We require information from authors about some types of materials, experimental systems and methods used in many studies. Here, indicate whether each material, system or method listed is relevant to your study. If you are not sure if a list item applies to your research, read the appropriate section before selecting a response.

### Materials & experimental systems

### Methods

| n/a                                 | Involved in the study                                     |
|-------------------------------------|-----------------------------------------------------------|
| <input type="checkbox"/>            | <input checked="" type="checkbox"/> Antibodies            |
| <input type="checkbox"/>            | <input checked="" type="checkbox"/> Eukaryotic cell lines |
| <input checked="" type="checkbox"/> | <input type="checkbox"/> Palaeontology and archaeology    |
| <input checked="" type="checkbox"/> | <input type="checkbox"/> Animals and other organisms      |
| <input checked="" type="checkbox"/> | <input type="checkbox"/> Clinical data                    |
| <input checked="" type="checkbox"/> | <input type="checkbox"/> Dual use research of concern     |
| <input checked="" type="checkbox"/> | <input type="checkbox"/> Plants                           |

| n/a                                 | Involved in the study                              |
|-------------------------------------|----------------------------------------------------|
| <input checked="" type="checkbox"/> | <input type="checkbox"/> ChIP-seq                  |
| <input type="checkbox"/>            | <input checked="" type="checkbox"/> Flow cytometry |
| <input checked="" type="checkbox"/> | <input type="checkbox"/> MRI-based neuroimaging    |

## Antibodies

### Antibodies used

Primary Antibodies:  
 CD31, R&D System AF806  
 PDGFR $\beta$ , Cell Signaling #3169  
 Collagen IV, Millipore AB769  
 Oct4, Thermo TA500035  
 Nanog, Sigma N3038  
 CD144 (VE-cadherin), Millipore MABT134  
 ZO1, Santacruz Technologies sc-8147  
 PDGFR $\alpha$ , Abcam ab203491  
 YAP1, NOVUS NB110-58358  
 NG2, Abcam ab86067  
 Ki67, Cell Signaling #91295  
 CC3 (Cleaved-Caspase 3), Cell Signaling #96615  
 CD31-AlexaFluor647, BD Biosciences, 558094  
 CD140b-PE, BD Biosciences, 558821  
 CD144-FITC, BD Biosciences, 560874  
 CD45-FITC, Invitrogen, 11-0459-41  
 CD90-PerCP/Cyanine5.5, Biolegend, 328117  
 CD73-BV650, BD Biosciences, 742633  
 CD44-PE, BD Biosciences, 550989  
 CD144-BV786, BD Biosciences, 565672  
 CD31, Abcam, ab28364  
 KDR, Cell Signaling #2479  
 eNOS, BD Biosciences 610297  
 GAPDH, SantaCruz sc-25778  
 H-H3, Cell Signaling #97155  
 Live/Dead-FVS780, BD Biosciences, 565388

Secondary Antibodies:  
 Alexa-Fluor 488 Donkey anti-Sheep, Invitrogen A11015  
 Alexa-Fluor 488 Donkey anti-Mouse, Invitrogen A21202  
 Alexa-Fluor 488 Donkey anti-Rabbit, Invitrogen A21206  
 Alexa-Fluor 555 Donkey anti-Rabbit, Invitrogen A31572  
 Alexa-Fluor 633 Donkey anti-Mouse, Invitrogen A21100  
 Alexa-Fluor 647 Donkey anti-Rabbit, Invitrogen A31573  
 Alexa-Fluor 647 Donkey anti-Goat, Jackson Immunolabs 705-606-147  
 Peroxidase-IgG Fraction Monoclonal Mouse Anti-Rabbit IgG, Jackson Immunolabs 211-032-171  
 Peroxidase-AffiniPure Goat Anti-Mouse IgG, Jackson Immunolabs 115-035-174

### Validation

The specificity of the antibodies was provided by the manufacturers:

CD31, R&D System AF806. ([https://www.rndsystems.com/products/human-cd31-pecam-1-antibody\\_af806](https://www.rndsystems.com/products/human-cd31-pecam-1-antibody_af806))  
 PDGFR $\beta$ , Cell Signaling #3169. (<https://www.cellsignal.com/product/productDetail.jsp?productId=3169>)  
 Collagen IV, Millipore AB769. ([https://www.merckmillipore.com/GB/en/product/Anti-Collagen-Type-IV-Antibody,MM\\_NF-AB769](https://www.merckmillipore.com/GB/en/product/Anti-Collagen-Type-IV-Antibody,MM_NF-AB769))  
 OCT4, Thermo TA500035. (<https://www.thermofisher.com/antibody/product/OCT4-Antibody-clone-OTI9B7-Monoclonal/TA500035>)  
 Nanog, Sigma N3038. (<https://www.sigmaaldrich.com/GB/en/product/sigma/n3038>)  
 CD144 (VE-cadherin), Millipore MABT134. ([https://www.merckmillipore.com/GB/en/product/Anti-VE-cadherin-Antibody-clone-BV6,MM\\_NF-MABT134](https://www.merckmillipore.com/GB/en/product/Anti-VE-cadherin-Antibody-clone-BV6,MM_NF-MABT134))  
 ZO1, Santacruz Technologies sc-8147. (<https://www.scbt.com/p/zo-1-antibody-n-19>)  
 PDGFR $\alpha$ , Abcam ab203491. (<https://www.abcam.com/products/primary-antibodies/pdgfr-alpha-antibody-epr22059-270-ab203491.html>)  
 YAP1, NOVUS NB110-58358. ([https://www.novusbio.com/products/yap1-antibody\\_nb110-58358](https://www.novusbio.com/products/yap1-antibody_nb110-58358))  
 NG2, Abcam ab86067. (<https://www.abcam.com/products/primary-antibodies/ng2-antibody-ab86067.html>)  
 Ki67, Cell Signaling #9129S. (<https://www.cellsignal.com/products/primary-antibodies/ki-67-d3b5-rabbit-mab/9129>)  
 CC3 (Cleaved-Caspase 3), Cell Signaling #9661S. (<https://www.cellsignal.com/product/productDetail.jsp?productId=9661>)  
 CD31-AlexaFluor647, BD Biosciences, 558094. (<https://www.bdbiosciences.com/en-gb/search-results?searchKey=558094>)  
 CD140b-PE, BD Biosciences, 558821. (<https://www.bdbiosciences.com/en-gb/search-results?searchKey=558821>)  
 CD144-FITC, BD Biosciences, 560874. (<https://www.bdbiosciences.com/en-gb/search-results?searchKey=560874>)  
 CD45-FITC, Invitrogen, 11-0459-41. (<https://www.thermofisher.com/antibody/product/CD45-Antibody-clone-HI30-Monoclonal/11-0459-42>)  
 CD90-PerCP/Cyanine5.5, Biolegend, 328117. (<https://www.biolegend.com/en-us/productstab/percp-cyanine5-5-anti-human-cd90-thy1-antibody-4515>)  
 CD73-BV650, BD Biosciences, 742633. (<https://www.bdbiosciences.com/en-us/search-results?searchKey=742633>)  
 CD44-PE, BD Biosciences, 550989. (<https://www.bdbiosciences.com/en-us/search-results?searchKey=550989>)  
 CD144-BV786, BD Biosciences, 565672. (<https://www.bdbiosciences.com/en-us/search-results?searchKey=565672>)  
 CD31, Abcam, ab28364 (<https://www.abcam.com/products/primary-antibodies/cd31-antibody-ab28364.html>)  
 KDR, Cell Signaling #2479. (<https://www.cellsignal.com/products/primary-antibodies/vegf-receptor-2-55b11-rabbit-mab/2479>)  
 eNOS, BD Biosciences 610297. (<https://www.bdbiosciences.com/en-gb/search-results?searchKey=610297>)  
 GAPDH, SantaCruz sc-25778. (<https://www.scbt.com/p/gapdh-antibody-fl-335>)  
 H-H3, Cell Signaling #9715S. (<https://www.cellsignal.com/products/primary-antibodies/histone-h3-antibody/9715>)  
 Live/Dead-FVS780, BD Biosciences, 565388. (<https://www.bdbiosciences.com/en-us/search-results?searchKey=565388>)

## Eukaryotic cell lines

Policy information about [cell lines and Sex and Gender in Research](#)

|                                                                   |                                                                                                                                                                                                                                                                                                                                                                                                                                                                                                                                                                                                                                                                                                                                                                                                                                                                                                                                                                                                                                                   |
|-------------------------------------------------------------------|---------------------------------------------------------------------------------------------------------------------------------------------------------------------------------------------------------------------------------------------------------------------------------------------------------------------------------------------------------------------------------------------------------------------------------------------------------------------------------------------------------------------------------------------------------------------------------------------------------------------------------------------------------------------------------------------------------------------------------------------------------------------------------------------------------------------------------------------------------------------------------------------------------------------------------------------------------------------------------------------------------------------------------------------------|
| Cell line source(s)                                               | KOLF2 iPS cells were obtained from the Wellcome Sanger Institute.<br>293T cells were purchased from LGC-ATCC (CRL-3216).<br>HUVECs were purchased from Promocell (C-12203).                                                                                                                                                                                                                                                                                                                                                                                                                                                                                                                                                                                                                                                                                                                                                                                                                                                                       |
| Authentication                                                    | The IPS cell line was produced by the Wellcome Sanger Institute as part of the Human Induced Pluripotent Stem Cell Initiative (HIPSCI). Characterisation includes genotyping arrays, expression arrays, methylation arrays, RNA-seq, Exome-seq, proteomic mass-spectrometry, whole genome sequencing, and high content cellular phenotyping. IPS cells were further validated based on morphology, expression of pluripotent markers using PCR, Western blot and immunostaining. Exclusion of exogenous reprogramming factors was confirmed by Real Time PCR.<br><br>293T cells were authenticated by LGC-ATCC based on morphology and STR PROFILING (D3S1358: 15,17 TH01: 7,9.3 D21S11: 28,30.2 D18S51: 17,18 Penta_E: 7,15 D5S818: 8,9 D13S317: 12,14 D7S820: 11 D16S539: 9,13 CSF1PO: 11,12 Penta_D: 9,10 Amelogenin: X vWA: 16,19 D8S1179: 12,14 TPOX: 11 FGA: 23 D19S433: 18 D2S1338: 19).<br><br>HUVECs were authenticated by Promocell based on morphology and endothelial cell marker expression (CD31, vWF, Dil-Ac-LDL uptake positive). |
| Mycoplasma contamination                                          | All cell lines were tested negative for mycoplasma contamination.                                                                                                                                                                                                                                                                                                                                                                                                                                                                                                                                                                                                                                                                                                                                                                                                                                                                                                                                                                                 |
| Commonly misidentified lines (See <a href="#">ICLAC</a> register) | No ICLAC line was used in this study.                                                                                                                                                                                                                                                                                                                                                                                                                                                                                                                                                                                                                                                                                                                                                                                                                                                                                                                                                                                                             |

## Flow Cytometry

### Plots

Confirm that:

- The axis labels state the marker and fluorochrome used (e.g. CD4-FITC).
- The axis scales are clearly visible. Include numbers along axes only for bottom left plot of group (a 'group' is an analysis of identical markers).
- All plots are contour plots with outliers or pseudocolor plots.
- A numerical value for number of cells or percentage (with statistics) is provided.

## Methodology

### Sample preparation

BVOs (n=7 per group) were mechanically dissociated using a scalpel and then incubated in Dissociation solution (1.7mg Dispase, 0.2mg Liberase and 0.1mg DNase per ml) in PBS for 20 min at 37°C. BVO solutions were passed up to 10 times through 21g needles. Approximately 50,000 single cells were resuspended in 100µl of FACS buffer (PBS containing 1% FBS) and stained with fluorescence-conjugated antibodies for 30 min at 4°C in the dark. The cells were washed in PBS and resuspended in 1% PFA in PBS. Data were acquired the following day using a Fortessa Flow Cytometer analyzer (BD) and analyzed using FlowJo software (Becton & Dickinson and Company).

### Instrument

Flow cytometry data were acquired using a Fortessa Flow Cytometer analyzer (BD).

### Software

Flow cytometry data were analyzed using FlowJo software (Becton & Dickinson and Company).

### Cell population abundance

The abundance of PDGFRβ was 52%, CD31 positive cells 31%, CD73 positive cells 4.49%, CD4 positive cells 2.5%, CD45 positive cells 2.61%

### Gating strategy

A gate was drawn around the population of interest excluding cells debris (P1)(SSC-A/FSC-A: 20k) and doublets (P2) (SSC-A/SSC-W: 60/90K). Dead cells were excluded in P3 using Live-Dead Gating/FSC-A. Positive cells were discriminated from negative ones based on the different markers gated from the unstained samples.

Tick this box to confirm that a figure exemplifying the gating strategy is provided in the Supplementary Information.
